# Supplementary material for: Compositional dependence of hydrodeoxygenation pathway selectivity for Ni2−xRhxP nanoparticle catalysts
Source: Royal Society of Chemistry journal article supplement (doi:10.1039/d3ta02071a), 2023-01-01
Supplement: d3ta02071a1.pdf [file d3ta02071a1.pdf]

## Supplementary Information

### Compositional Dependence of Hydrodeoxygenation Pathway Selectivity for Ni<sub>2-x</sub>Rh<sub>x</sub>P Nanoparticle Catalysts

Nicole J. LiBretto<sup>a†</sup>, Sean A. Tacey<sup>a‡</sup>, Muhammad Zubair<sup>b</sup>, Tuong V. Bui<sup>a§</sup>, Kinga A. Unocic<sup>c</sup>, Frederick G. Baddour<sup>a</sup>, Michael B. Griffin<sup>a</sup>, Joshua A. Schaidle<sup>a</sup>, Carrie A. Farberow<sup>a\*</sup>, Daniel A. Ruddy<sup>a\*</sup>, Nicholas M. Bedford<sup>b\*</sup>, and Susan E. Habas<sup>a\*</sup>

<sup>a</sup> National Renewable Energy Laboratory, Catalytic Carbon Transformation and Scale-up Center, Golden, CO, USA.

<sup>b</sup> University of New South Wales, School of Chemical Engineering, Sydney, NSW, AUS.

<sup>c</sup> Oak Ridge National Laboratory, Center for Nanophase Materials Sciences, Oak Ridge, TN, USA.

\*carrie.farberow@nrel.gov, \*dan.ruddy@nrel.gov, \*n.bedford@unsw.edu.au,

\*susan.habas@nrel.gov

## **Table of Contents**

|                            |     |
|----------------------------|-----|
| Experimental Methods.....  | S3  |
| Computational Methods..... | S5  |
| Supporting Data.....       | S6  |
| References.....            | S26 |

## Methods

**Materials.** Synthetic manipulations to prepare transition metal phosphide (TMP) nanoparticles (NPs) were conducted under a N<sub>2</sub> atmosphere using standard Schlenk techniques or in an N<sub>2</sub>-filled Vacuum Atmospheres glovebox, unless otherwise noted. **Caution:** *The metal phosphide precursors have the potential to evolve pyrophoric and/or toxic phosphorus species under reaction conditions. These reactions should only be performed by trained personnel under air-free conditions.* Oleylamine (OAm, 70%) and 1-octadecene (ODE) were purchased from Sigma-Aldrich and dried prior to use by heating to 120 °C and 150 °C under vacuum, respectively, and were stored in an N<sub>2</sub>-filled glovebox. Triphenylphosphine (PPh<sub>3</sub>, 99%) was purchased from Sigma-Aldrich and used without further purification. The Ni(CO)<sub>2</sub>(PPh<sub>3</sub>)<sub>2</sub> and RhCl(CO)(PPh<sub>3</sub>)<sub>2</sub> complexes were purchased from Strem Chemicals and used as received. The silica support (Sipernat-22) was provided by Evonik and calcined at 600 °C in flowing air prior to use. The Brunauer–Emmett–Teller (BET) surface area of the calcined silica support was measured as 190 m<sup>2</sup> g<sup>-1</sup>, and the aqueous incipient wetness point was determined to be 3.9 mL g<sup>-1</sup>. Crushed quartz (150-250 and 300-425 micron, Powder Technologies Inc.) and silicon carbide (177-250 micron, McMaster Carr) were used as diluent materials during reactor testing. Guaiacol and *m*-cresol were obtained in high purity from Sigma-Aldrich, and acetone (HPLC grade) was obtained from Fischer Scientific. A certified gas blend of 5% argon/95% hydrogen was obtained from Air Liquide.

### **Characterization.**

#### *Scanning Transmission Electron Microscopy (STEM)*

The TMP NPs were suspended in chloroform and drop-cast onto carbon-coated copper grids (Ted Pella part no. 01824). Image analysis and particle size distributions were obtained using ImageJ software.<sup>1</sup> Lattice spacings were measured from the fast-Fourier transforms (FFTs) of high-resolution STEM (HR-STEM) images. Size distributions were determined from a manual diameter measurement of >100 particles.

#### *X-ray Diffraction (XRD) and simulated XRD patterns*

Unsupported NPs were suspended in chloroform and drop-cast onto glass slides. The glass slide was loaded into the instrument at a fixed *z*-axis height. A NIST Si standard was used to calibrate shifts between diffraction patterns of different samples. Theoretical diffraction patterns were simulated at room temperature using crystal information files (cif) downloaded from the Inorganic Crystal Structure Database (ICSD) and imported to Materials Analysis Using Diffraction (MAUD) program,<sup>2</sup> which was used to identify the catalyst phase. A Rietveld refinement was performed in MAUD to fit the XRD patterns with varying amounts of Rh. By modifying the cif file of the parent binary Ni<sub>2</sub>P structure to allow the identity of the Ni atoms to vary as either Ni or Rh, the location of the Rh atoms was determined. The lattice parameters (*a* and *c*) were also determined.

#### *High Energy X-ray Diffraction (HE-XRD)/Atomic Pair Distribution Function (PDF)*

*In situ* HE-XRD experiments were performed at the 6-ID-D beamline of the Advanced Photon Source (APS) at Argonne National Laboratory using an *in-situ* capillary heating cell.<sup>3</sup> The as-synthesized SiO<sub>2</sub>-supported NPs were loaded into the capillary cell. HE-XRD patterns were

collected at room temperature, 350 °C in 5% H<sub>2</sub>/Ar, and at 350 °C in guaiacol-saturated 5% H<sub>2</sub>/Ar. A reciprocal space maximum,  $Q_{\max}$ , of  $\sim 28 \text{ \AA}^{-1}$  was obtained using 100 keV X-rays. HE-XRD data were background corrected, transformed into reduced structure factors, and Fourier transformed into PDFs using PDFGETX3.<sup>4</sup>

Reverse Monte Carlo (RMC) simulations were performed on Ni<sub>2</sub>P and Ni<sub>1.6</sub>Rh<sub>0.4</sub>P using a spherical supercell of 65,953 atoms in a hexagonal Ni<sub>2</sub>P lattice ( $\sim 11.5 \text{ nm}$ ) as a starting structure, while Rh<sub>2</sub>P was modeled starting with a 98,461 atom supercell ( $\sim 12.5 \text{ nm}$ ) from the known cubic Rh<sub>2</sub>P structure. The simulation sizes were selected based on nanoparticle sizes observed from TEM. The initial configuration of Ni<sub>1.6</sub>Rh<sub>0.4</sub>P was created by random distribution of Rh atoms in substitutional sites throughout the parent Ni<sub>2</sub>P hexagonal supercell. RMC calculations were performed using the program fullrnc<sup>5</sup> by applying non-periodic boundary conditions with random move generator in any direction for all atom groups. The RMC models were refined by introducing constraints such as intramolecular pair distances from the experimental atomic PDFs. In Ni<sub>1.6</sub>Rh<sub>0.4</sub>P, a metal atom swapping function was implemented to prevent biasing of the final fitted structure by the original starting configuration. Further, the RMC simulated structures were analyzed by defining distance as a proxy for bonding environment. Average bond distances and coordination numbers were calculated from RMC-generated structures for all atoms that fall within the first coordination sphere ( $\sim 3 \text{ \AA}$ ).

**Chemisorption.** Catalyst samples (*ca.* 250 mg of SiO<sub>2</sub>-supported material) were diluted with 750 mg of quartz chips and loaded into a quartz u-tube. The sample was dehydrated at 100 °C in flowing N<sub>2</sub> for 30 minutes, reduced in flowing UHP H<sub>2</sub> at 350 °C for 1 h (heating rate of 5 °C/min), and subsequently evacuated under vacuum for 8 h. H<sub>2</sub> chemisorption isotherms were measured at 150 °C over the pressure range of 200-800 torr. The site density (units of  $\mu\text{mol}_{\text{H}^*}/\text{g}_{\text{cat}}$ , and converted to  $\text{mol}_{\text{H}^*}/\text{mol}_{\text{M}}$ ) was determined from the difference of the combined and weak isotherms extrapolated to zero pressure.

### **Catalyst Evaluation.**

The conversion ( $X$ ) was calculated as the difference between inlet and outlet molar flow rate of guaiacol or *m*-cresol, divided by the inlet molar flow rate of guaiacol or *m*-cresol as shown in Equation 1.

$$X = \frac{F_{\text{liquidFeed} - \text{inlet}} - F_{\text{liquidFeed} - \text{outlet}}}{F_{\text{liquidFeed} - \text{inlet}}} \quad (1)$$

Where  $F_{\text{liquidFeed} - \text{inlet}}$  and  $F_{\text{liquidFeed} - \text{outlet}}$  are the molar flow rates (mol/min) of guaiacol or *m*-cresol in the inlet and outlet streams, respectively.

The selectivity of product  $i$  ( $S_i$ ) was defined as the ratio of outlet molar flow rate of product  $i$  ( $F_i$ ) divided by the total outlet molar flow rate of all products as shown in Equation 2.

$$(2)$$

$$S_i = \frac{F_i}{\sum_{i=1}^n F_i}$$

The carbon selectivity of product  $i$  ( $SC_i$ ) was calculated as the outlet carbon molar flow rate of product  $i$  (where  $C_i$  is the number of carbon atoms in component  $i$  and  $F_i$  is the outlet molar flow rate of component  $i$ ) divided by the total outlet carbon molar flow rate of all products as shown in Equation 3.

$$SC_i = \frac{C_i \times F_i}{\sum_{i=1}^n C_i \times F_i} \quad (3)$$

Site-time yield ( $STY$ ) was calculated according to Equation 4, where  $\rho_s$  is the H\*-site density ( $\text{mol}_{\text{H}^*}/\text{g}_{\text{cat}}$ ),  $m_c$  is the catalyst mass ( $\text{g}_{\text{cat}}$ ), and  $\sum_{i=1}^n F_i$  is the sum of the outlet molar flow rates of each product ( $\text{mol}/\text{min}$ ).

$$STY = \frac{\sum_{i=1}^n F_i}{\rho_s m_c} \quad (4)$$

### Computational Methods

Ionic convergence was set to occur once the forces acting upon each atom fell below  $0.02 \text{ eV}/\text{\AA}$ . The surface Brillouin zone was sampled using a  $6 \times 6 \times 1$  Monkhorst-Pack k-point meshes for the  $(1 \times 1)$  surface models, while a  $2 \times 2 \times 1$  k-point mesh was utilized for the larger  $(3 \times 3)$   $\text{Ni}_{2-x}\text{Rh}_x\text{P}(0001)$  and  $(4 \times 4)$   $\text{Rh}_2\text{P}(100)$  surface unit cells. Adsorption was limited to one side of the slab models, with adsorbate-induced dipole corrections implemented in the  $z$  direction.<sup>6,7</sup>

The interaction between surface intermediates and the studied surfaces was described through the adsorption energy ( $E_B$ ), in which

$$E_B = E_{\text{tot}} - E_{\text{clean}} - E_{\text{gas}}$$

where  $E_{\text{tot}}$ ,  $E_{\text{clean}}$ , and  $E_{\text{gas}}$  are the energies of the adsorbate on the surface, the clean surface, and the adsorbate species in the gas-phase adsorbate, respectively. The electronic structures of Ni, Rh, and P atoms in the  $\text{Ni}_{2-x}\text{Rh}_x\text{P}$  and  $\text{Rh}_2\text{P}$  model systems were evaluated using Bader charge analyses,<sup>8-11</sup> as well as  $d$ - and  $sp$ -band center calculations.<sup>12,13</sup>

## Supplementary Experimental Data

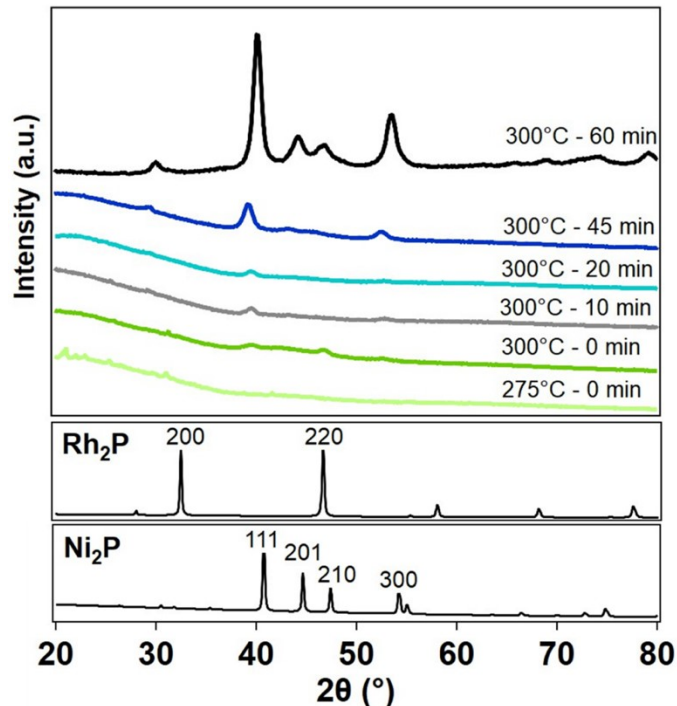

**Figure S1.** XRD patterns of aliquots taken during  $\text{Ni}_{1.6}\text{Rh}_{0.4}\text{P}$  synthesis at increasing temperature and time, with reference patterns for  $\text{Rh}_2\text{P}$  and  $\text{Ni}_2\text{P}$  below.

**Table S1.** XRD reflections of unsupported  $\text{Ni}_{2-x}\text{Rh}_x\text{P}$  NPs and vol%  $\text{Rh}_2\text{P}$  phase separation determined from Rietveld refinement analysis of experimental XRD patterns.

| Targeted Composition                     | Major XRD reflections (°)          | vol% cubic $\text{Rh}_2\text{P}$ crystal structure |
|------------------------------------------|------------------------------------|----------------------------------------------------|
| $\text{Ni}_2\text{P}$                    | 40.8, 44.7, 47.4, 54.4             | 0                                                  |
| $\text{Ni}_{1.8}\text{Rh}_{0.2}\text{P}$ | 40.6, 44.6, 47.2, 54.4             | 0                                                  |
| $\text{Ni}_{1.6}\text{Rh}_{0.4}\text{P}$ | 40.3, 44.6, 47.0, 53.6             | 0                                                  |
| $\text{Ni}_{1.4}\text{Rh}_{0.6}\text{P}$ | 40.1, 44.5, 46.8, 53.3             | 0                                                  |
| $\text{Ni}_{1.2}\text{Rh}_{0.8}\text{P}$ | 40.0, 44.5, 46.7, 53.2             | 3                                                  |
| $\text{Ni}_{1.0}\text{Rh}_{1.0}\text{P}$ | 32.7, 39.8, 47.3, 53.2, 59.1, 68.5 | 50                                                 |
| $\text{Rh}_2\text{P}$                    | 32.2, 46.4, 55.3, 58.0, 68.1       | 100                                                |

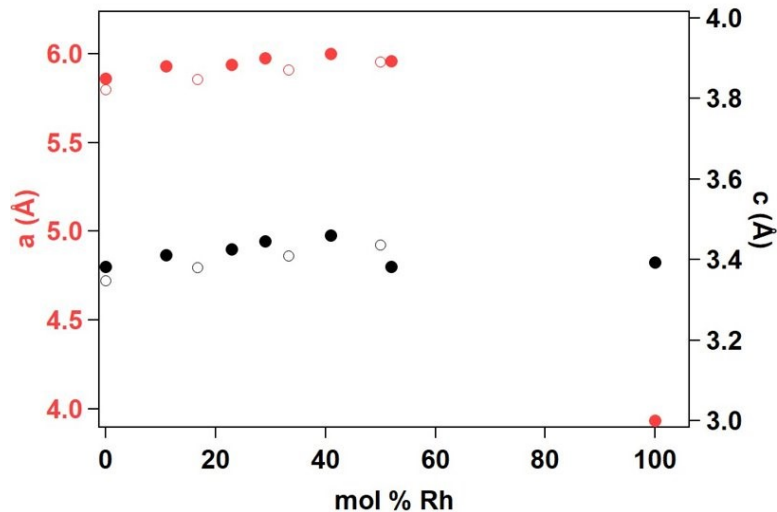

**Figure S2.** Lattice parameters  $a$  (red) and  $c$  (black) derived from experiment (solid) and DFT calculations (open) for the  $\text{Ni}_{2-x}\text{Rh}_x\text{P}$  NPs as a function of measured Rh mol%.

**Table S2.** Measured ( $d_m$ ) and reference ( $d_{\text{ref}}$ , 27162-ICSD) interplanar spacings, Bravais-Miller indices of the associated family of lattice planes ( $hkl$ ), and measured and reference angles between designated reflections notated on the FFT of the high resolution HAADF-STEM image of  $\text{Ni}_{1.6}\text{Rh}_{0.4}\text{P}$  NPs in Figure 2.

|          | $d_m$ (Å) | $d_{\text{ref}}$ (Å) | $hkl_{\text{ref}}$      |           | Angle $_m$ (°) | Angle $_{\text{ref}}$ (°) |
|----------|-----------|----------------------|-------------------------|-----------|----------------|---------------------------|
| <b>A</b> | 2.350     | 2.2143               | 1 2 1 1                 | <b>AB</b> | 43.54          | 44.40                     |
| <b>B</b> | 2.342     | 2.2143               | $\bar{1}$ 1 2 1         | <b>BC</b> | 68.13          | 67.80                     |
| <b>C</b> | 3.156     | 2.9295               | $\bar{2}$ 1 1 0         | <b>CD</b> | 68.34          | 67.80                     |
| <b>D</b> | 2.350     | 2.2143               | $\bar{1}$ 2 $\bar{1}$ 1 | <b>DE</b> | 43.53          | 44.40                     |
| <b>E</b> | 2.342     | 2.2143               | 1 1 $\bar{2}$ $\bar{1}$ | <b>EF</b> | 68.13          | 67.80                     |
| <b>F</b> | 3.156     | 2.9295               | 2 $\bar{1}$ $\bar{1}$ 0 | <b>FA</b> | 68.34          | 67.80                     |

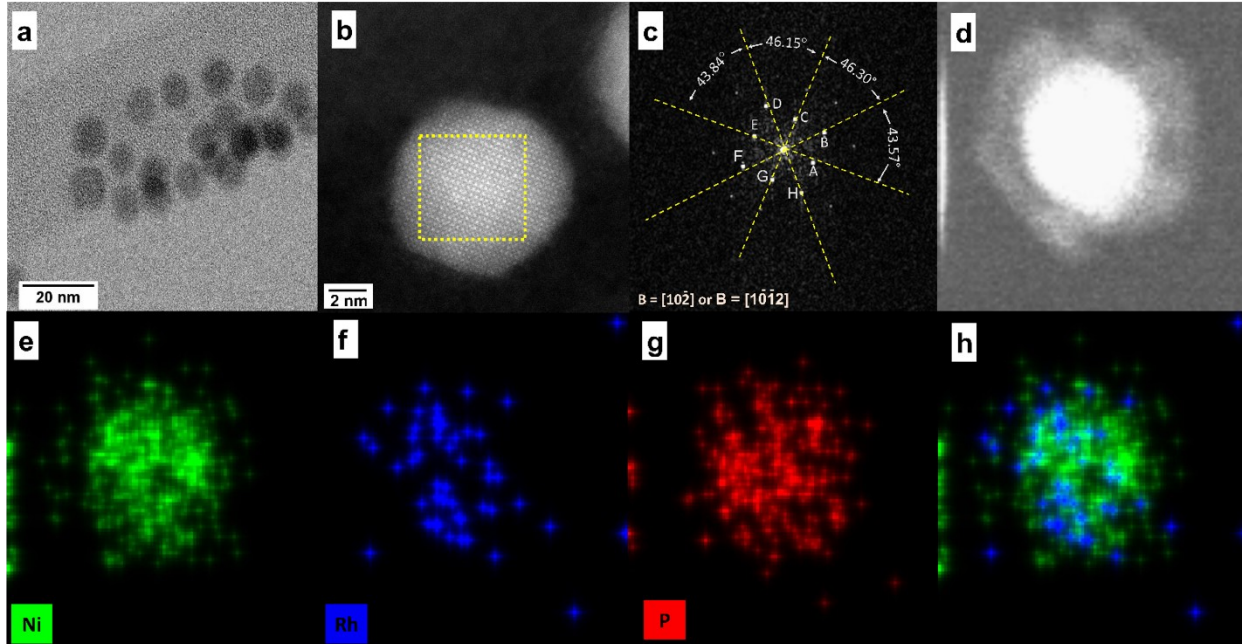

**Figure S3.** **a)** Bright field (BF)-STEM image of  $\text{Ni}_{1.8}\text{Rh}_{0.2}\text{P}$  NPs, **b)** high resolution HAADF-STEM image with the **c)** FFT oriented along  $[1\ 0\ \bar{1}\ 2]$  direction. **d)** HAADF-STEM image for EDS analysis and associated EDS elemental maps for **e)** Ni **f)** Rh **g)** P, and **h)** Ni and Rh overlaid.

**Table S3.** Measured ( $d_m$ ) and reference ( $d_{ref}$ , 27162-ICSD) interplanar spacings, Bravais-Miller indices of the associated family of lattice planes ( $hki\bar{l}$ ), and measured and reference angles between designated reflections notated on the FFT of the high resolution HAADF-STEM image of  $\text{Ni}_{1.8}\text{Rh}_{0.2}\text{P}$  NPs in Figure S3.

|          | $d_m$ (Å) | $d_{ref}$ (Å) | $hki\bar{l}_{ref}$      |           | Angle <sub>m</sub> (°) | Angle <sub>ref</sub> (°) |
|----------|-----------|---------------|-------------------------|-----------|------------------------|--------------------------|
| <b>A</b> | 2.825     | 2.8142        | 1 0 $\bar{3}$ 1         | <b>AB</b> | 43.31                  | 43.85                    |
| <b>B</b> | 2.060     | 2.0295        | 0 2 2 1                 | <b>BC</b> | 46.73                  | 46.15                    |
| <b>C</b> | 2.988     | 2.9290        | $\bar{1}$ 2 1 0         | <b>CD</b> | 46.30                  | 46.15                    |
| <b>D</b> | 2.051     | 2.0295        | 2 2 4 $\bar{1}$         | <b>DE</b> | 43.66                  | 43.84                    |
| <b>E</b> | 2.825     | 2.8142        | $\bar{1}$ 0 3 $\bar{1}$ | <b>EF</b> | 43.69                  | 43.85                    |
| <b>F</b> | 2.060     | 2.0295        | 0 $\bar{2}$ 2 $\bar{1}$ | <b>FG</b> | 46.30                  | 43.15                    |
| <b>G</b> | 2.988     | 2.9290        | 1 $\bar{2}$ $\bar{1}$ 0 | <b>GH</b> | 46.50                  | 43.15                    |
| <b>H</b> | 2.051     | 2.0295        | 2 2 4 1                 | <b>HA</b> | 43.51                  | 43.84                    |



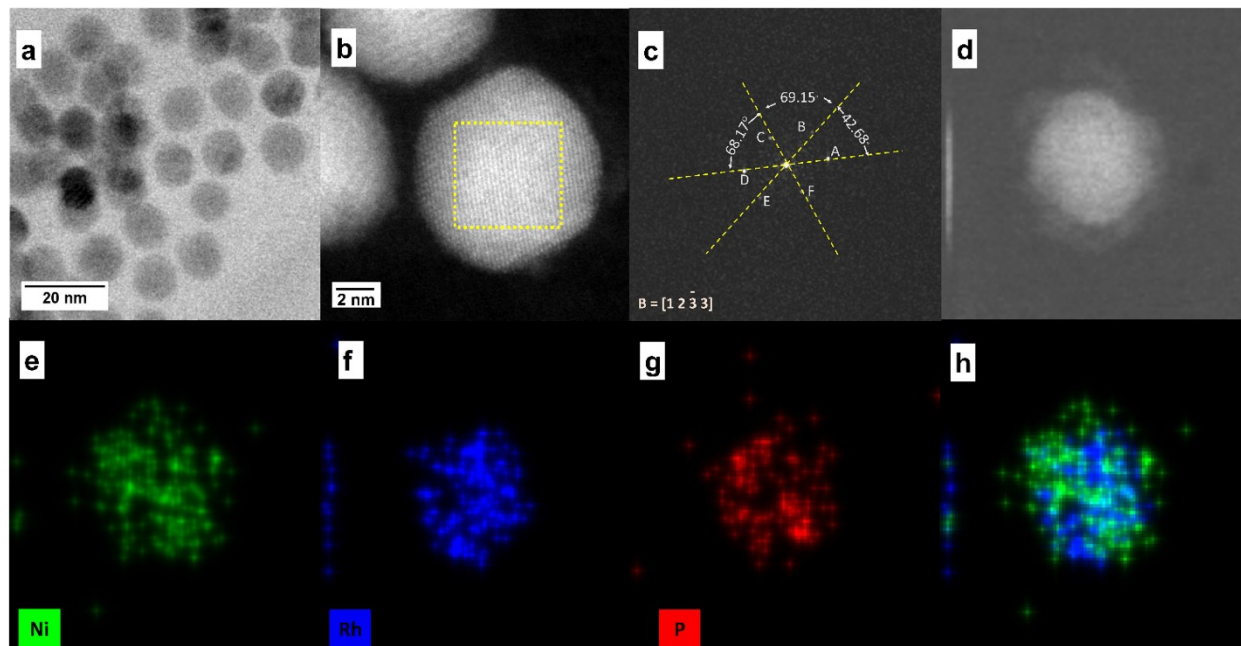

**Figure S4.** **a)** Bright field (BF)-STEM image of  $\text{Ni}_{1.4}\text{Rh}_{0.6}\text{P}$  NPs, **b)** high resolution HAADF-STEM image with the **c)** FFT oriented along  $[1\ 2\ \bar{3}\ 3]$  direction. **d)** HAADF-STEM image for EDS analysis and associated EDS elemental maps for **e)** Ni **f)** Rh **g)** P, and **h)** Ni and Rh overlaid.

**Table S4.** Measured ( $d_m$ ) and reference ( $d_{\text{ref}}$ , 27162-ICSD) interplanar spacings, Bravais-Miller indices of the associated family of lattice planes ( $hkl$ ), and measured and reference angles between designated reflections notated on the FFT of the high resolution HAADF-STEM image of  $\text{Ni}_{1.4}\text{Rh}_{0.6}\text{P}$  NPs in Figure S4.

|          | $d_m$ (Å) | $d_{\text{ref}}$ (Å) | $hkl_{\text{pdf}}$             |           | Angle <sub>m</sub> (°) | Angle <sub>ref</sub> (°) |
|----------|-----------|----------------------|--------------------------------|-----------|------------------------|--------------------------|
| <b>A</b> | 2.281     | 2.214                | $1\ \bar{2}\ 1\ 1$             | <b>AB</b> | 42.68                  | 44.41                    |
| <b>B</b> | 2.308     | 2.214                | $\bar{1}\ \bar{1}\ 2\ 1$       | <b>BC</b> | 69.15                  | 67.74                    |
| <b>C</b> | 3.139     | 2.929                | $\bar{2}\ 1\ 1\ 0$             | <b>CD</b> | 68.17                  | 67.74                    |
| <b>D</b> | 2.281     | 2.214                | $\bar{1}\ 2\ \bar{1}\ \bar{1}$ | <b>DE</b> | 42.68                  | 44.41                    |
| <b>E</b> | 2.308     | 2.214                | $1\ 1\ 2\ \bar{1}$             | <b>EF</b> | 69.15                  | 67.74                    |
| <b>F</b> | 3.139     | 2.929                | $2\ \bar{1}\ \bar{1}\ 0$       | <b>FA</b> | 68.17                  | 67.74                    |

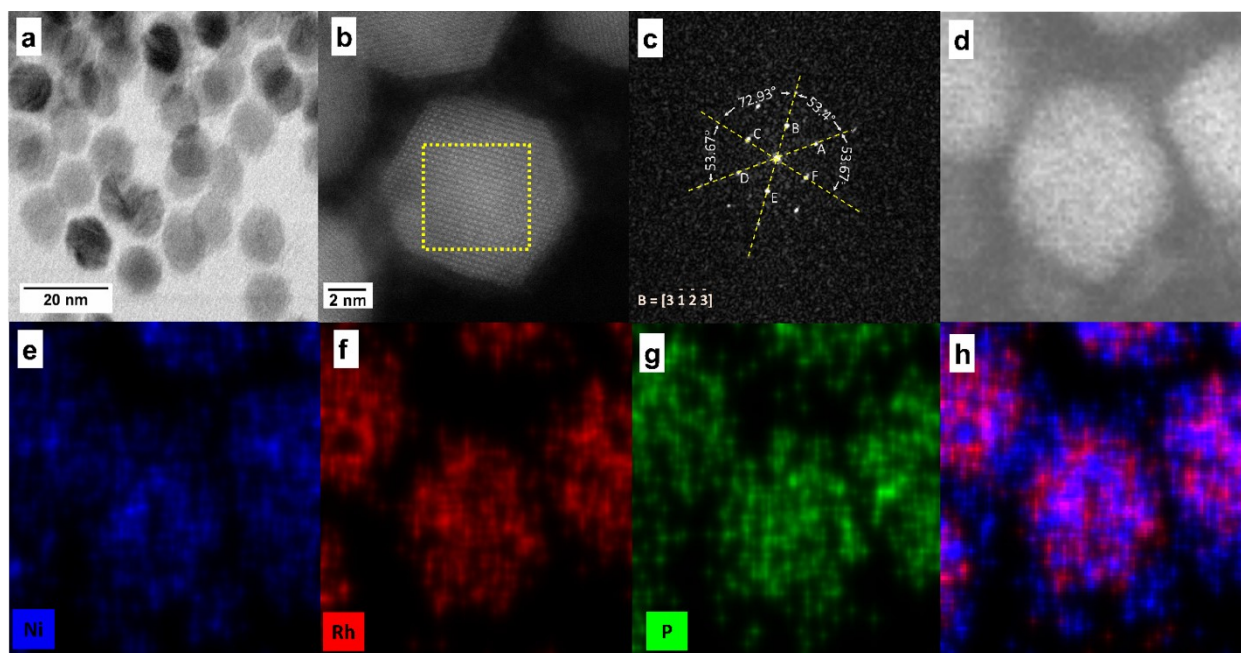

**Figure S5.** **a)** Bright field (BF)-STEM image of  $\text{Ni}_{1.2}\text{Rh}_{0.8}\text{P}$  NPs, **b)** high resolution HAADF-STEM image with the **c)** FFT oriented along  $[3\ 1\ 2\ 3]$  direction. **d)** HAADF-STEM image for EDS analysis and associated EDS elemental maps for **e)** Ni **f)** Rh **g)** P, and **h)** Ni and Rh overlaid.

**Table S5.** Measured ( $d_m$ ) and reference ( $d_{ref}$ , 27162-ICSD) interplanar spacings, Bravais-Miller indices of the associated family of lattice planes ( $hki\bar{l}$ ), and measured and reference angles between designated reflections notated on the FFT of the high resolution HAADF-STEM image of  $\text{Ni}_{1.2}\text{Rh}_{0.8}\text{P}$  NPs in Figure S5.

|          | $d_m$ (Å) | $d_{ref}$ (Å) | $hki\bar{l}_{ref}$       |           | $\text{Angle}_m$ (°) | $\text{Angle}_{ref}$ (°) |
|----------|-----------|---------------|--------------------------|-----------|----------------------|--------------------------|
| <b>A</b> | 2.509     | 2.219         | $\bar{1}\ 5\ 4\ 0$       | <b>AB</b> | 53.40                | 53.02                    |
| <b>B</b> | 3.024     | 2.370         | $4\ 2\ \bar{6}\ 0$       | <b>BC</b> | 72.93                | 73.49                    |
| <b>C</b> | 2.978     | 2.693         | $5\ 3\ \bar{2}\ 1$       | <b>CD</b> | 53.67                | 53.47                    |
| <b>D</b> | 2.509     | 2.219         | $\bar{1}\ 5\ 4\ 0$       | <b>DE</b> | 53.40                | 53.02                    |
| <b>E</b> | 3.024     | 2.370         | $\bar{4}\ \bar{2}\ 6\ 1$ | <b>EF</b> | 72.93                | 73.49                    |
| <b>F</b> | 2.978     | 2.693         | $\bar{5}\ 3\ \bar{2}\ 1$ | <b>FA</b> | 53.67                | 53.47                    |

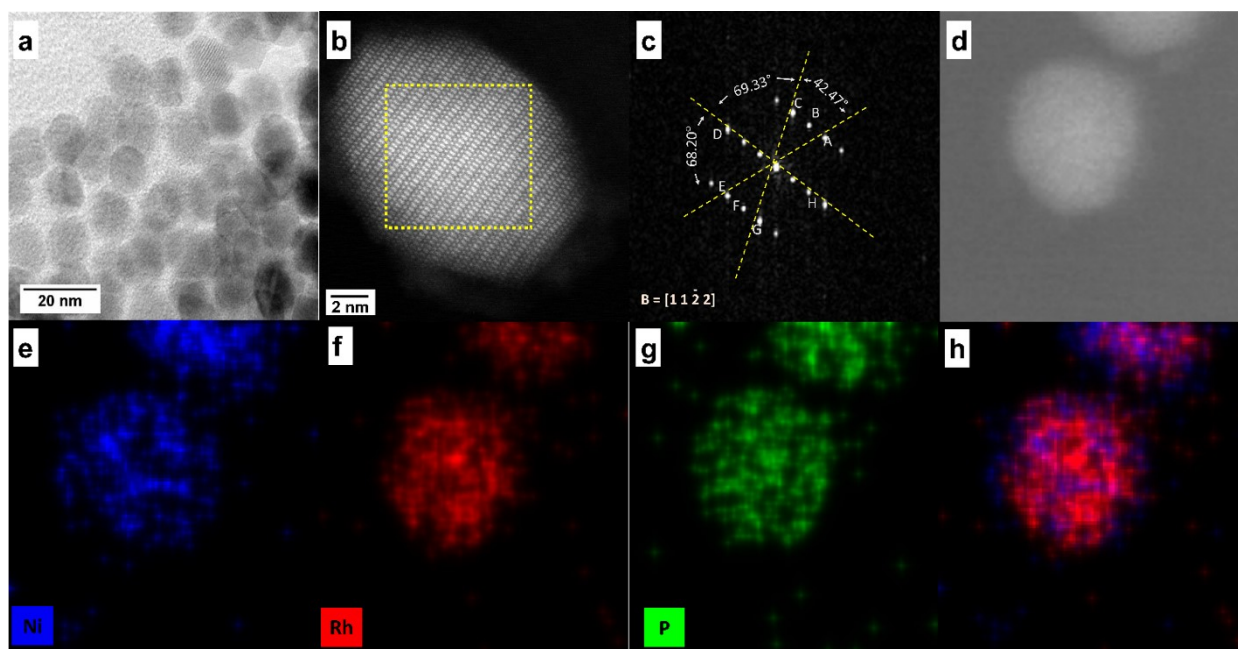

**Figure S6.** **a)** Bright field (BF)-STEM image of  $\text{Ni}_{1.0}\text{Rh}_{1.0}\text{P}$  NPs, **b)** high resolution HAADF-STEM image with the **c)** FFT oriented along  $[1122]$  direction. **d)** HAADF-STEM image for EDS analysis and associated EDS elemental maps for **e)** Ni **f)** Rh **g)** P, and **h)** Ni and Rh overlaid.

**Table S6.** Measured ( $d_m$ ) and reference ( $d_{\text{ref}}$ , 27162-ICSD) interplanar spacings, Bravais-Miller indices of the associated family of lattice planes ( $hkil$ ), and measured and reference angles between designated reflections notated on the FFT of the high resolution HAADF-STEM image of  $\text{Ni}_{1.0}\text{Rh}_{1.0}\text{P}$  NPs in Figure S6.

|          | $d_m$ (Å) | $d_{\text{ref}}$ (Å) | $hkil_{\text{ref}}$     |           | Angle <sub>m</sub> (°) | Angle <sub>ref</sub> (°) |
|----------|-----------|----------------------|-------------------------|-----------|------------------------|--------------------------|
| <b>A</b> | 2.304     | 2.029                | 0 2 $\bar{2}$ $\bar{1}$ | <b>AB</b> | 21.12                  | 23.57                    |
| <b>B</b> | 2.481     | 2.214                | 1 1 $\bar{2}$ $\bar{1}$ | <b>BC</b> | 21.35                  | 23.57                    |
| <b>C</b> | 2.324     | 2.029                | 2 0 $\bar{2}$ $\bar{1}$ | <b>CD</b> | 69.33                  | 66.42                    |
| <b>D</b> | 6.364     | 5.074                | 1 $\bar{1}$ 0 0         | <b>DE</b> | 68.20                  | 66.42                    |
| <b>E</b> | 2.304     | 2.029                | 0 $\bar{2}$ 2 1         | <b>EF</b> | 21.12                  | 23.57                    |
| <b>F</b> | 2.481     | 2.214                | $\bar{1}$ $\bar{1}$ 2 1 | <b>FG</b> | 21.35                  | 23.57                    |
| <b>G</b> | 2.324     | 2.029                | 2 0 2 1                 | <b>GH</b> | 69.33                  | 66.42                    |
| <b>H</b> | 6.364     | 5.074                | $\bar{1}$ 1 0 0         | <b>HA</b> | 68.20                  | 66.42                    |

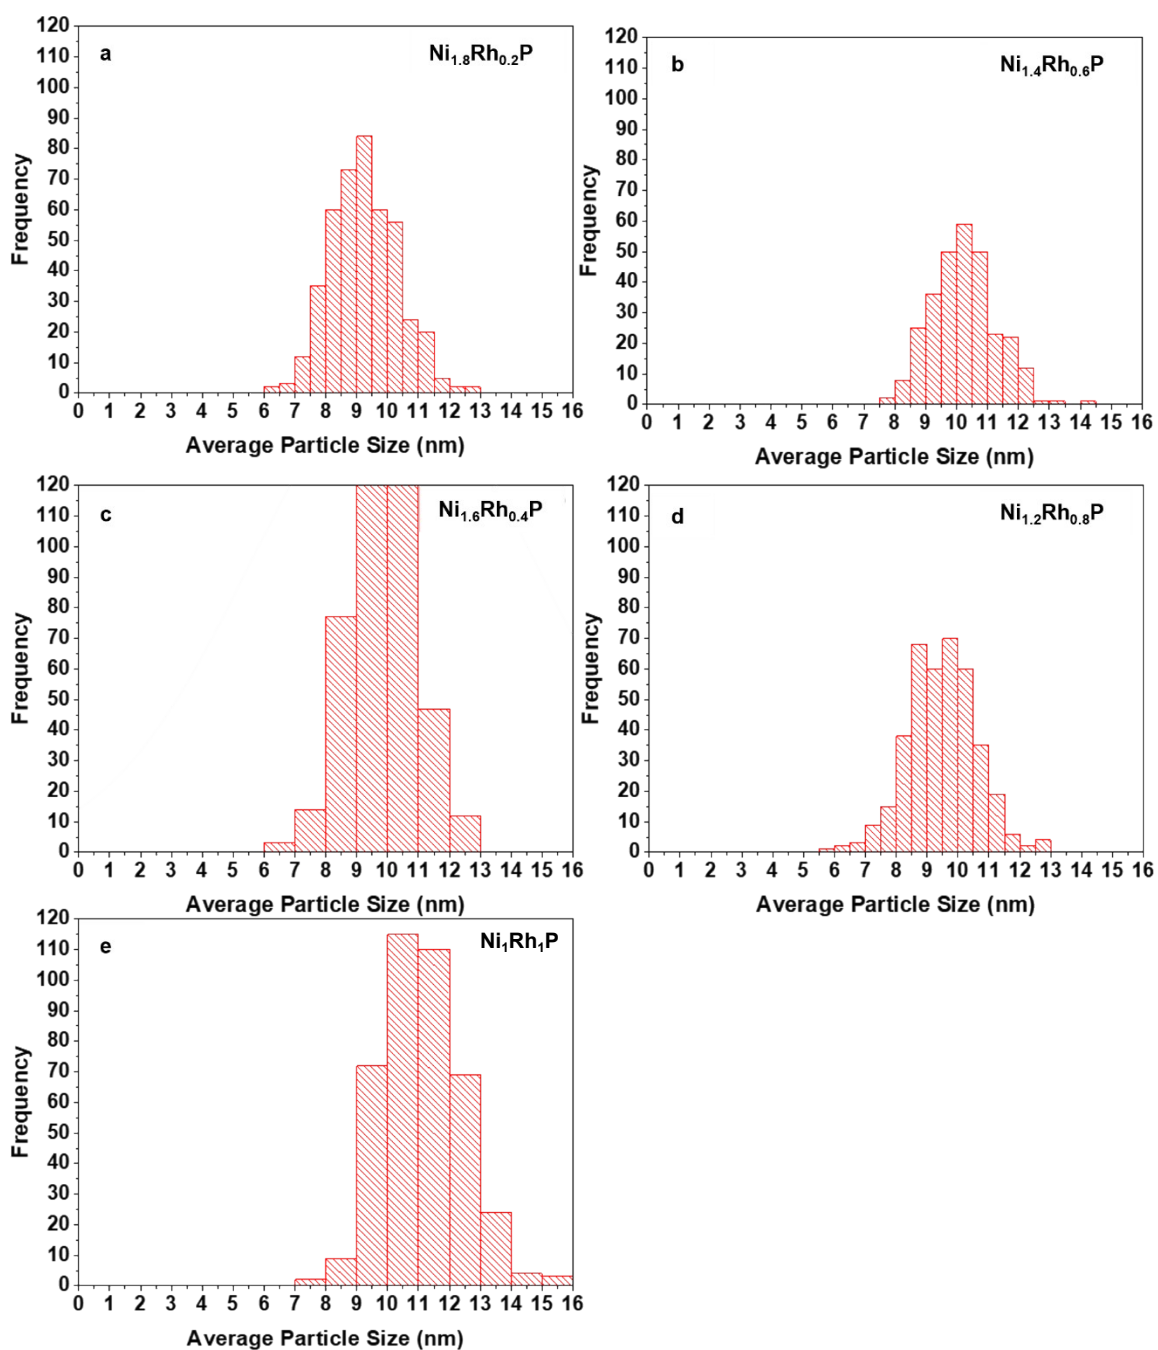

**Figure S7.** Particle size distributions measured from STEM images of **a)**  $\text{Ni}_{1.8}\text{Rh}_{0.2}\text{P}$  **b)**  $\text{Ni}_{1.6}\text{Rh}_{0.4}\text{P}$  **c)**  $\text{Ni}_{1.4}\text{Rh}_{0.6}\text{P}$  **d)**  $\text{Ni}_{1.2}\text{Rh}_{0.8}\text{P}$  and **e)**  $\text{Ni}_{1.0}\text{Rh}_{1.0}\text{P}$  NPs.

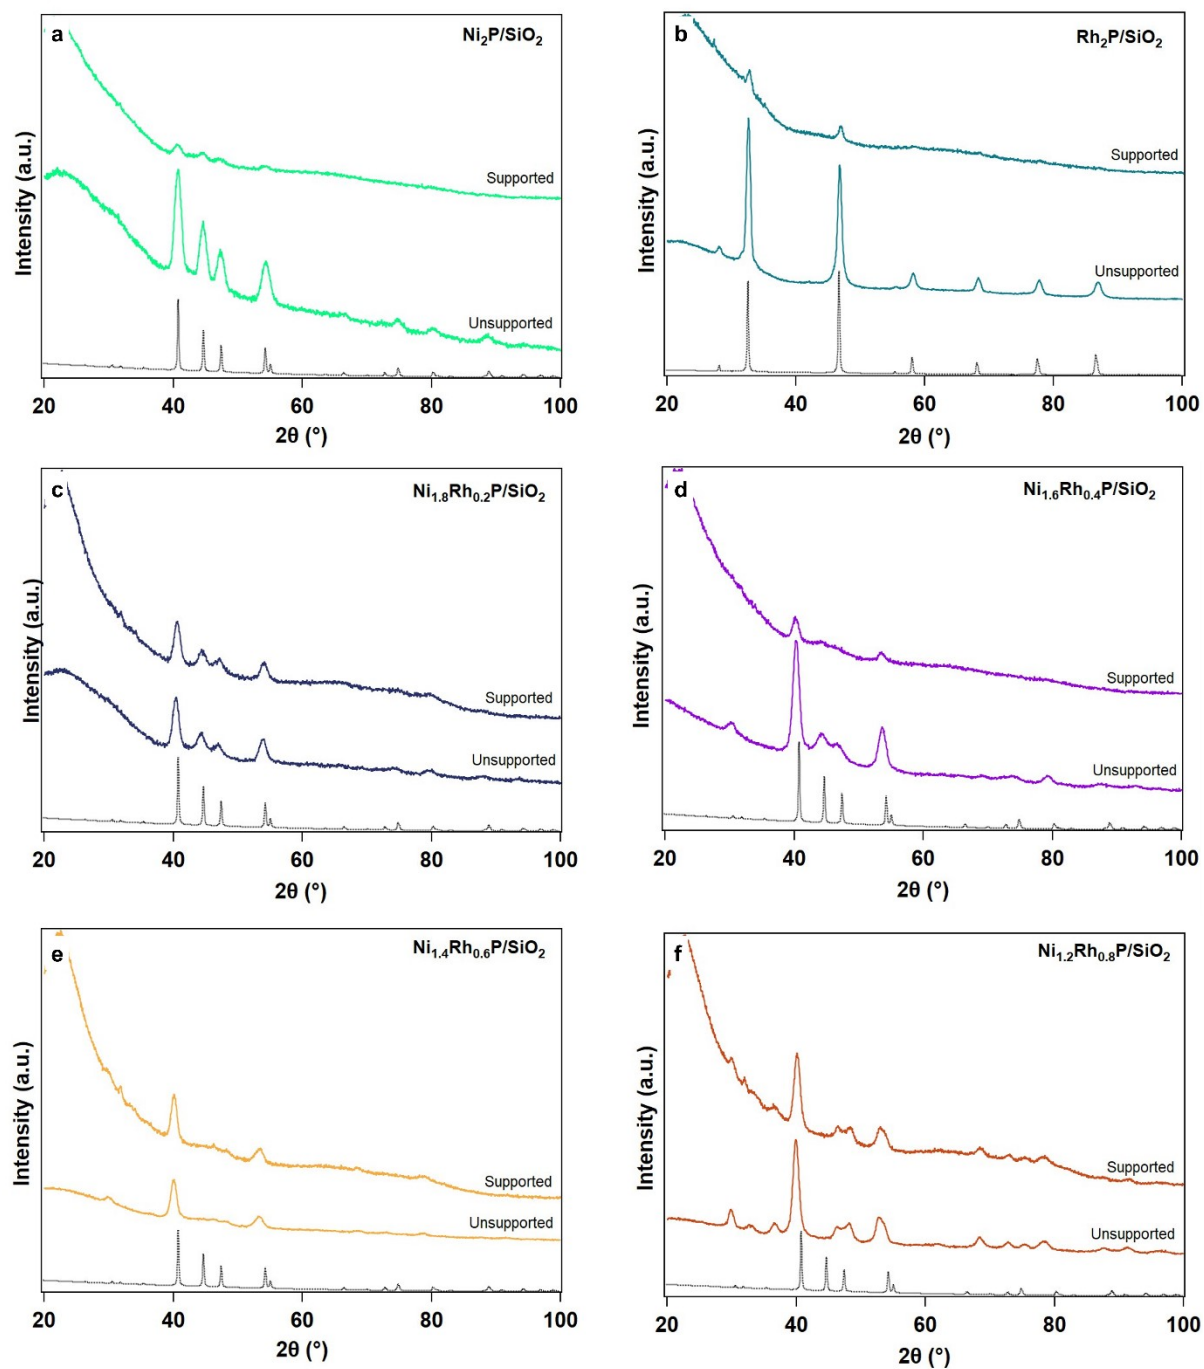

**Figure S8.** XRD patterns of unsupported and silica-supported **a)**  $\text{Ni}_2\text{P}$ , **b)**  $\text{Rh}_2\text{P}$ , **c)**  $\text{Ni}_{1.8}\text{Rh}_{0.2}\text{P}$ , **d)**  $\text{Ni}_{1.6}\text{Rh}_{0.4}\text{P}$ , **e)**  $\text{Ni}_{1.4}\text{Rh}_{0.6}\text{P}$ , and **f)**  $\text{Ni}_{1.2}\text{Rh}_{0.8}\text{P}$  NPs with associated reference patterns. Each material contains *ca.* 5 wt%  $\text{Ni}_{2-x}\text{Rh}_x\text{P}$ .

**Table S7.** Summary of properties of SiO<sub>2</sub>-supported TMP catalysts including particle size determined by XRD, and weight loadings and molar ratios determined by inductively coupled plasma-optical emission spectroscopy.

| <b>Sample</b>                         | <b>XRD size (nm)</b> | <b>wt% Ni</b> | <b>wt% Rh</b> | <b>wt% P</b> | <b>wt% active phase</b> | <b>Rh/Ni Molar Ratio</b> | <b>M/P Molar Ratio</b> |
|---------------------------------------|----------------------|---------------|---------------|--------------|-------------------------|--------------------------|------------------------|
| Ni <sub>2</sub> P                     | 9.8                  | 3.47          | -             | 1.15         | 4.4                     | -                        | 1.59                   |
| Ni <sub>1.8</sub> Rh <sub>0.2</sub> P | 8.8                  | 3.15          | 0.67          | 1.18         | 4.7                     | 0.12                     | 1.59                   |
| Ni <sub>1.6</sub> Rh <sub>0.4</sub> P | 9.1                  | 2.34          | 1.25          | 0.90         | 4.2                     | 0.31                     | 1.78                   |
| Ni <sub>1.4</sub> Rh <sub>0.6</sub> P | 9.0                  | 2.33          | 1.67          | 0.99         | 4.6                     | 0.41                     | 1.76                   |
| Ni <sub>1.2</sub> Rh <sub>0.8</sub> P | 9.6                  | 1.84          | 2.26          | 0.90         | 4.6                     | 0.70                     | 1.83                   |
| Rh <sub>2</sub> P                     | 11.6                 | -             | 3.66          | 0.70         | 4.2                     | -                        | 1.58                   |



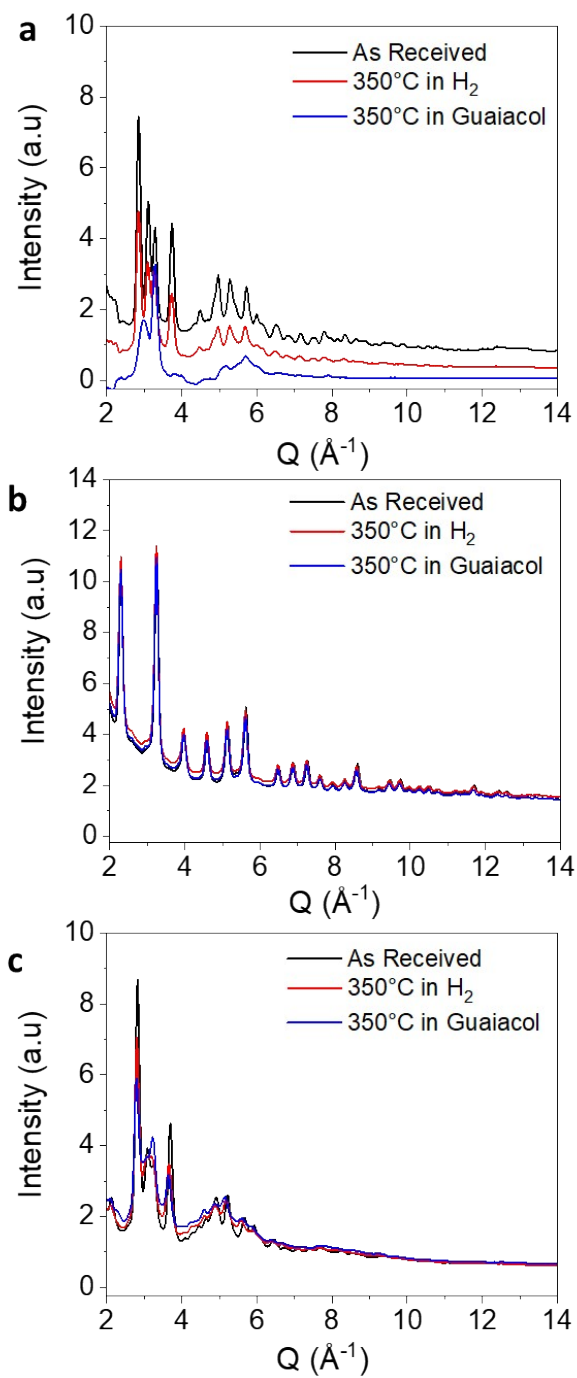

**Figure S9.** *In-situ* HE-XRD reciprocal space raw data at ambient temperature, 350 °C in H<sub>2</sub>, and 350 °C in guaiacol and H<sub>2</sub> for **a)** Ni<sub>2</sub>P/SiO<sub>2</sub>, **b)** Rh<sub>2</sub>P/SiO<sub>2</sub>, and **c)** Ni<sub>1.6</sub>Rh<sub>0.4</sub>P/SiO<sub>2</sub>.

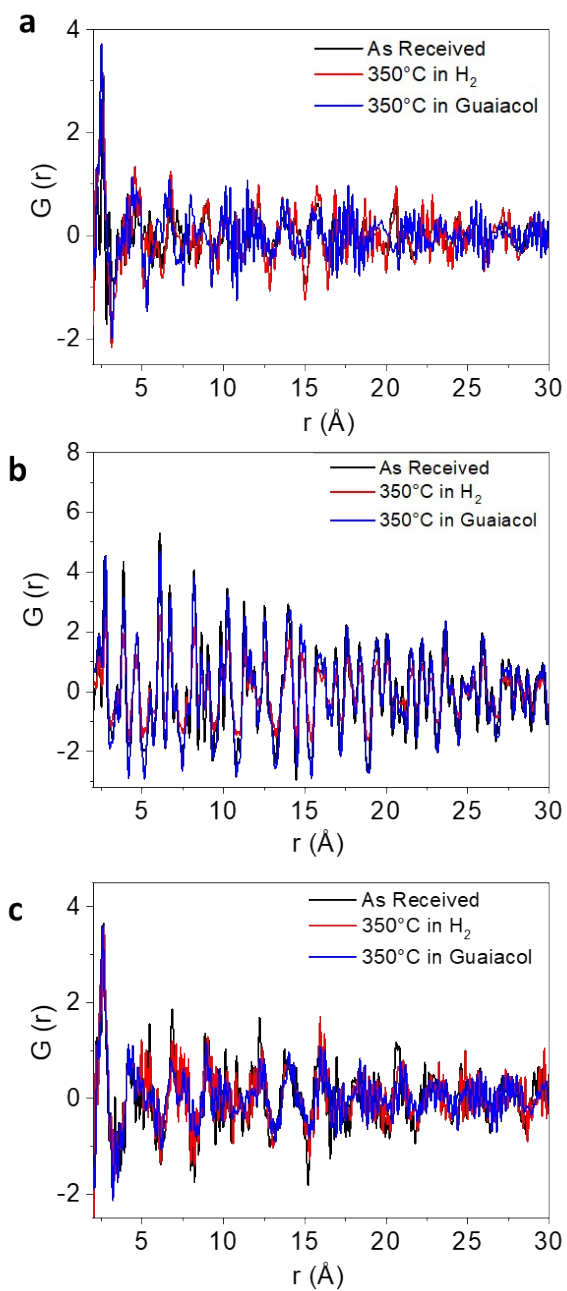

**Figure S10.** Long range PDFs at ambient temperature, 350 °C in H<sub>2</sub>, and 350 °C in guaiacol and H<sub>2</sub> for **a)** Ni<sub>2</sub>P/SiO<sub>2</sub> **b)** Rh<sub>2</sub>P/SiO<sub>2</sub> and **c)** Ni<sub>1.6</sub>Rh<sub>0.4</sub>P/SiO<sub>2</sub>.



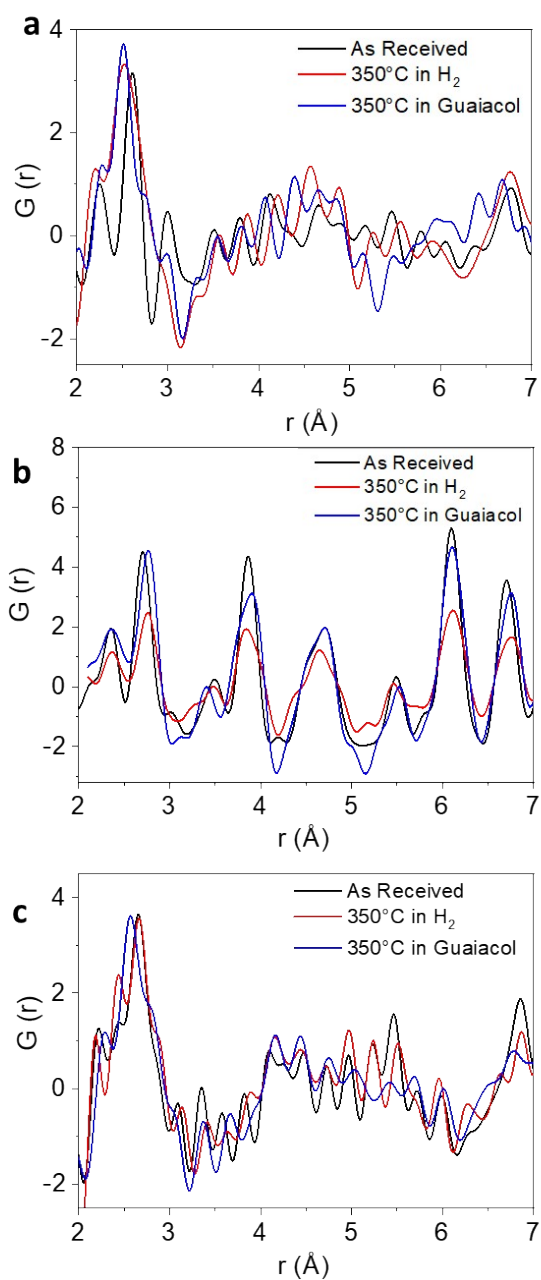

**Figure S11.** Short range PDFs at ambient temperature, 350 °C in H<sub>2</sub>, and 350 °C in guaiacol and H<sub>2</sub> for **a)** Ni<sub>2</sub>P/SiO<sub>2</sub> **b)** Rh<sub>2</sub>P/SiO<sub>2</sub> and **c)** Ni<sub>1.6</sub>Rh<sub>0.4</sub>P/SiO<sub>2</sub>.

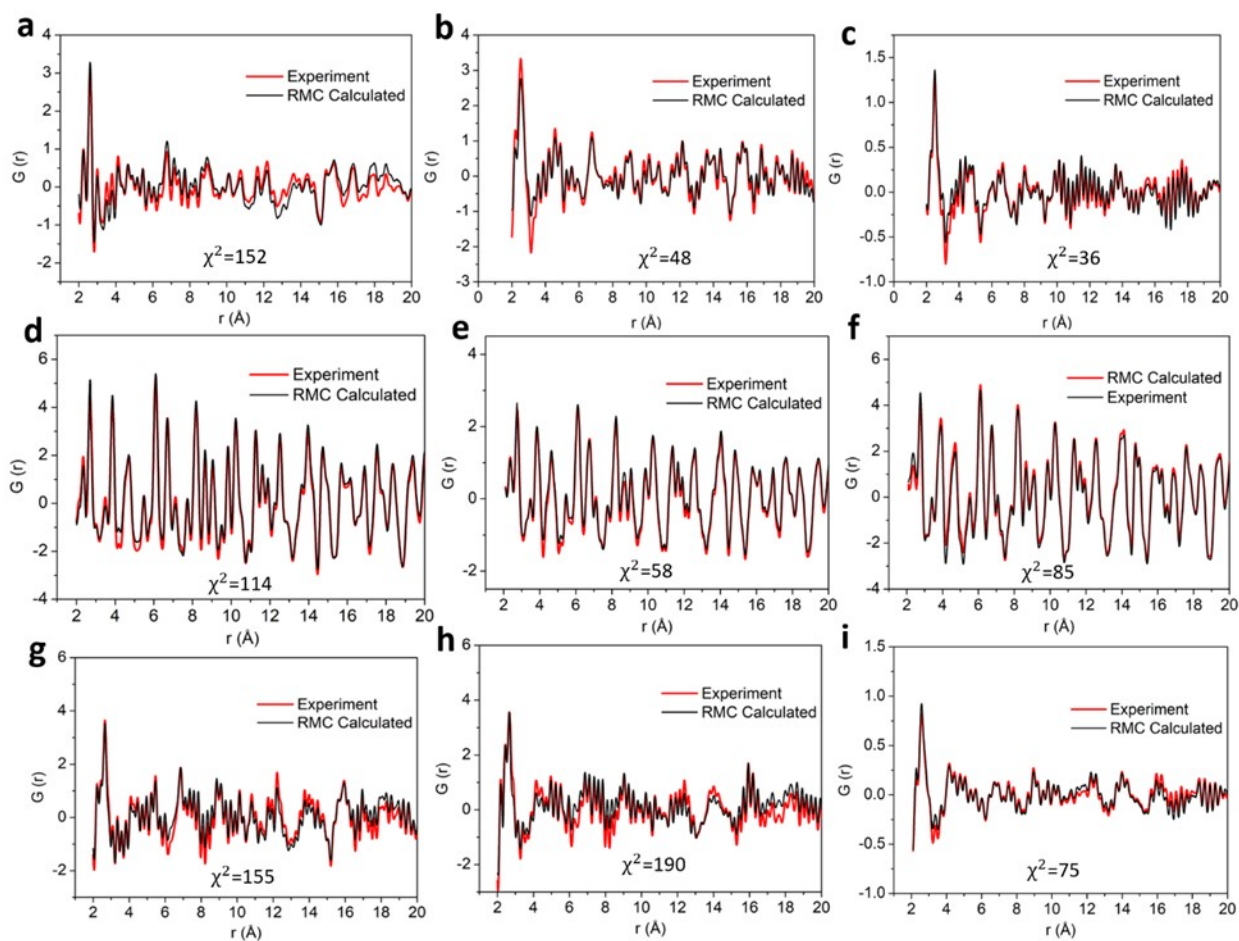

**Figure S12.** RMC fits for **a)** Ni<sub>2</sub>P/SiO<sub>2</sub> at room temperature, **b)** Ni<sub>2</sub>P/SiO<sub>2</sub> at 350 °C in H<sub>2</sub>, **c)** Ni<sub>2</sub>P/SiO<sub>2</sub> at 350 °C in guaiacol and H<sub>2</sub>, **d)** Rh<sub>2</sub>P/SiO<sub>2</sub> at ambient temperature, **e)** Rh<sub>2</sub>P/SiO<sub>2</sub> at 350°C in H<sub>2</sub>, **f)** Rh<sub>2</sub>P/SiO<sub>2</sub> at 350 °C in guaiacol and H<sub>2</sub>, **g)** Ni<sub>1.6</sub>Rh<sub>0.4</sub>P/SiO<sub>2</sub> at ambient temperature, **h)** Ni<sub>1.6</sub>Rh<sub>0.4</sub>P/SiO<sub>2</sub> at 350 °C in H<sub>2</sub>, and **i)** Ni<sub>1.6</sub>Rh<sub>0.4</sub>P/SiO<sub>2</sub> at 350 °C in guaiacol and H<sub>2</sub>.

**Table S8.** Summary of structural parameters including average coordination number, average bond length, and ratio of M-M to M-P coordination numbers at ambient temperature, 350 °C in H<sub>2</sub>, and 350 °C in guaiacol and H<sub>2</sub> from RMC simulations, shown in Figures S13, S14, and S15, below.

| Sample                                                    | Scattering Pair | Room Temperature |      |             | 350 °C H <sub>2</sub> |      |             | 350 °C Guaiacol |      |             |
|-----------------------------------------------------------|-----------------|------------------|------|-------------|-----------------------|------|-------------|-----------------|------|-------------|
|                                                           |                 | CN               | R(Å) | M-M/<br>M-P | CN                    | R(Å) | M-M/<br>M-P | CN              | R(Å) | M-M/<br>M-P |
| Ni <sub>2</sub> P/SiO <sub>2</sub>                        | Ni-P            | 2.35             | 2.30 | 1.45        | 2.15                  | 2.30 | 1.63        | 2.00            | 2.27 | 1.7         |
|                                                           | Ni-Ni           | 3.40             | 2.63 |             | 3.45                  | 2.60 |             | 3.4             | 2.56 |             |
| Ni <sub>1.6</sub> Rh <sub>0.4</sub><br>P/SiO <sub>2</sub> | Ni-P            | 2.15             | 2.35 | 1.48        | 2.00                  | 2.35 | 1.65        | 2.00            | 2.32 | 1.66        |
|                                                           | Ni-Ni           | 3.07             | 2.65 |             | 3.35                  | 2.65 |             | 3.40            | 2.61 |             |
|                                                           | Rh-P            | 2.30             | 2.42 |             | 2.12                  | 2.45 |             | 2.12            | 2.40 |             |
|                                                           | Ni-Rh           | 0.38             | 2.69 |             | 0.39                  | 2.69 |             | 0.35            | 2.67 |             |
|                                                           | Rh-Ni           | 1.45             | 2.69 |             | 1.47                  | 2.69 |             | 1.33            | 2.67 |             |
|                                                           | Rh-Rh           | 2.08             | 2.69 |             | 2.00                  | 2.69 |             | 2.1             | 2.68 |             |
| Rh <sub>2</sub> P/SiO <sub>2</sub>                        | Rh-P            | 2.70             | 2.40 | 1.30        | 2.13                  | 2.41 | 1.40        | 2.05            | 2.40 | 1.51        |
|                                                           | Rh-Rh           | 3.00             | 2.70 |             | 3.00                  | 2.72 |             | 3.10            | 2.75 |             |

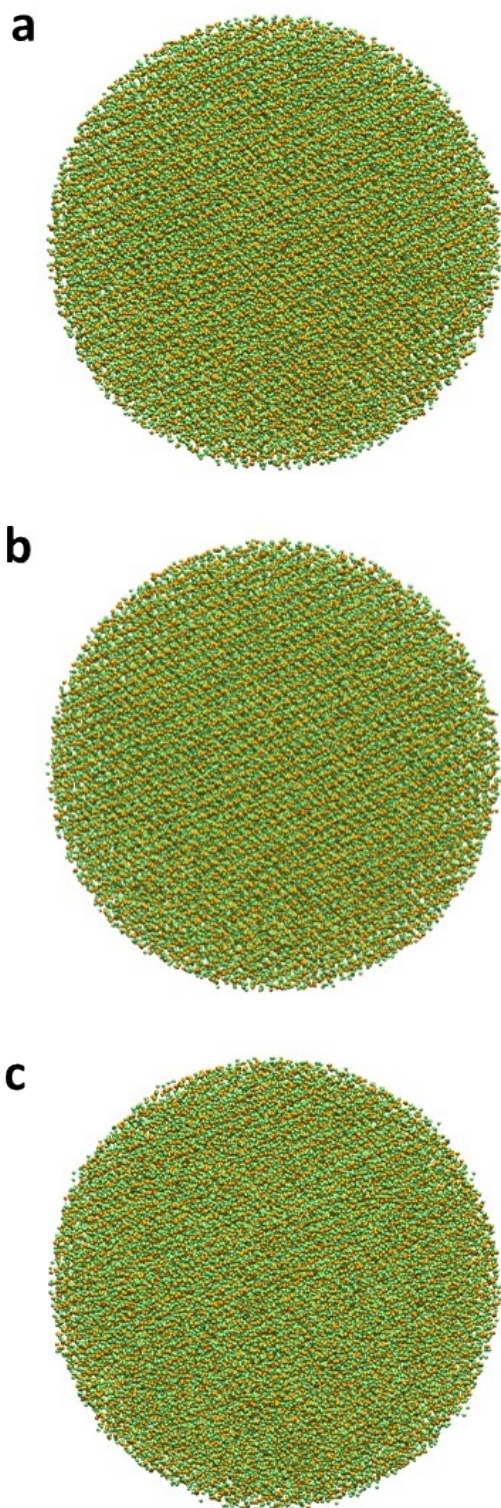

**Figure S13.** RMC models for Ni<sub>2</sub>P/SiO<sub>2</sub> at **a)** ambient temperature, **b)** 350 °C in H<sub>2</sub>, and **c)** 350 °C in guaiacol and H<sub>2</sub>.

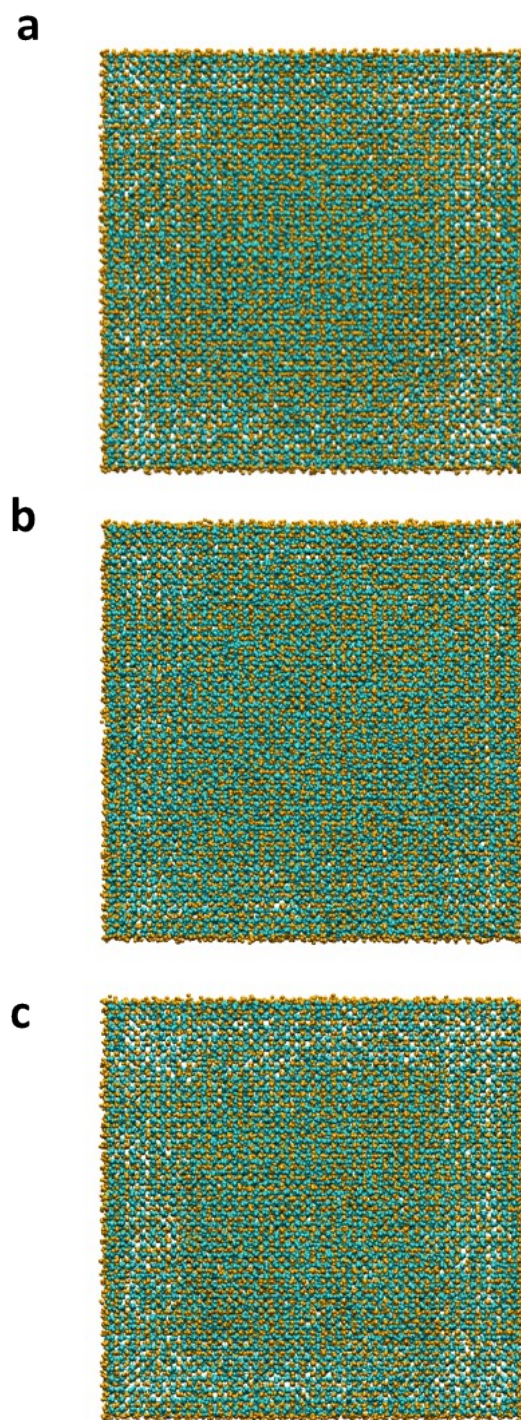

**Figure S14.** RMC models for Rh<sub>2</sub>P/SiO<sub>2</sub> at **a)** ambient temperature, **b)** 350 °C in H<sub>2</sub>, and **c)** 350 °C in guaiacol and H<sub>2</sub>.



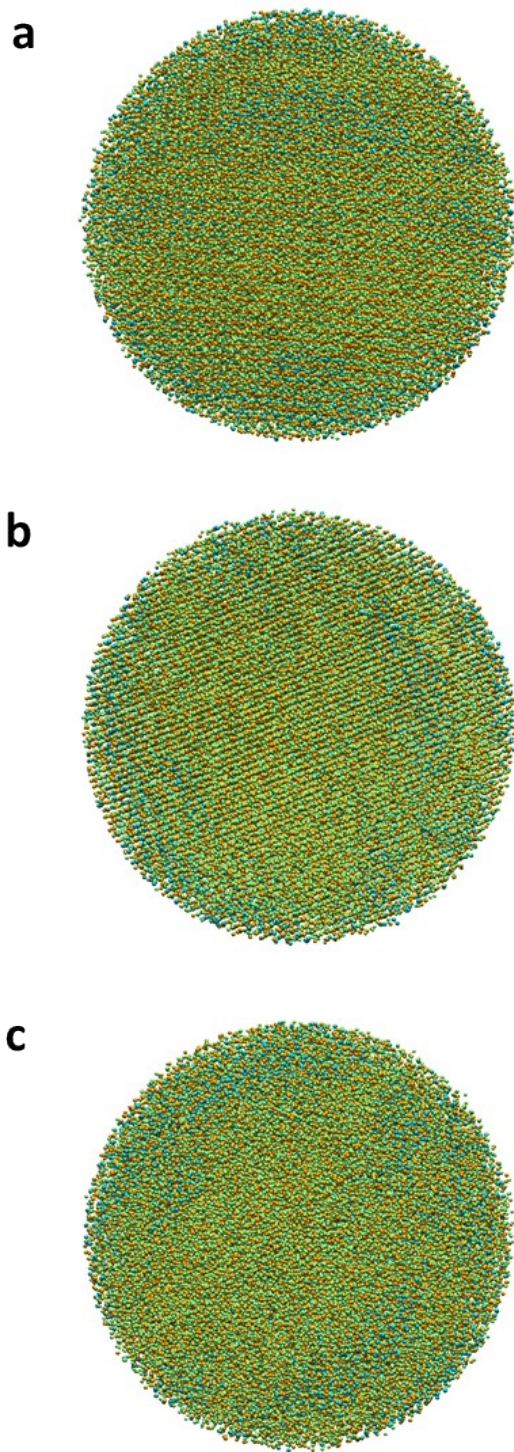

**Figure S15.** RMC models for  $\text{Ni}_{1.6}\text{Rh}_{0.4}\text{P}/\text{SiO}_2$  at **a)** ambient temperature, **b)** 350 °C in  $\text{H}_2$ , and **c)** 350 °C in guaiacol and  $\text{H}_2$ .

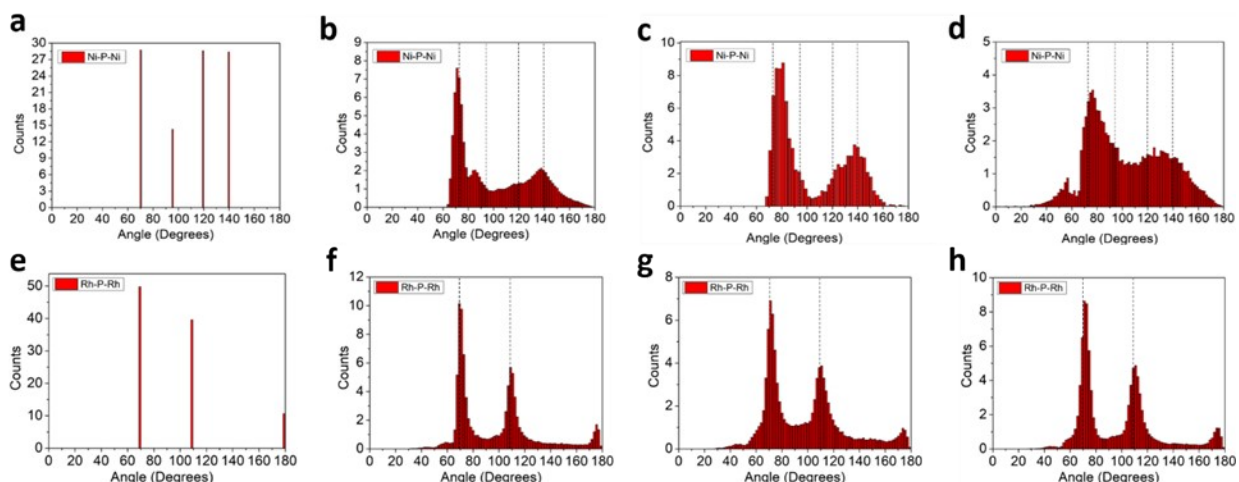

**Figure S16.** Bond angle distributions (Metal-P-Metal) for **a)** ideal  $\text{Ni}_2\text{P}$  hexagonal structure, **b)**  $\text{Ni}_2\text{P}$  at ambient temperature, **c)**  $\text{Ni}_2\text{P}$  at 350 °C in  $\text{H}_2$ , **d)**  $\text{Ni}_2\text{P}$  at 350 °C in guaiacol, **e)** ideal  $\text{Rh}_2\text{P}$  cubic structure, **f)**  $\text{Rh}_2\text{P}$  at ambient temperature, **g)**  $\text{Rh}_2\text{P}$  at 350 °C in  $\text{H}_2$ , and **h)**  $\text{Rh}_2\text{P}$  at 350 °C in guaiacol. Dashed vertical lines represent angles for ideal hexagonal  $\text{Ni}_2\text{P}$  or cubic  $\text{Rh}_2\text{P}$  crystal structures.

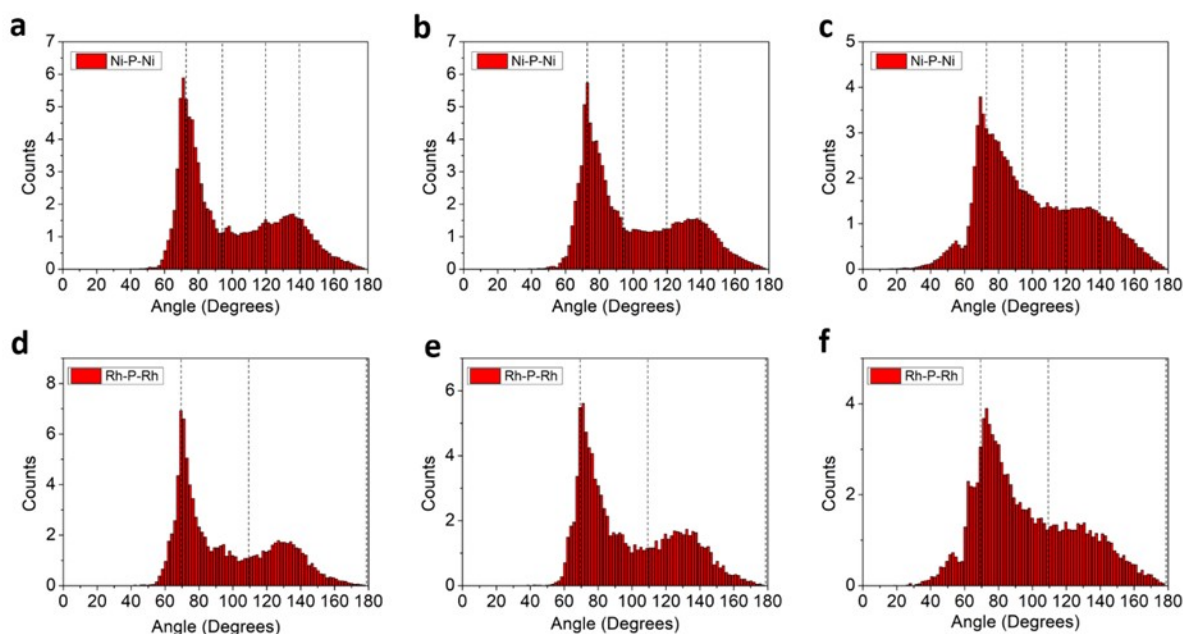

**Figure S17.** **a,b,c)** Ni-P-Ni angle distribution in  $\text{Ni}_{1.6}\text{Rh}_{0.4}\text{P}$  at ambient temperature, 350 °C in  $\text{H}_2$  and 350 °C in guaiacol respectively. **d,e,f)** Rh-P-Rh angle distribution in  $\text{Ni}_{1.6}\text{Rh}_{0.4}\text{P}$  at ambient temperature, 350 °C in  $\text{H}_2$  and 350 °C in guaiacol, respectively. Dashed vertical lines represent angles for ideal hexagonal  $\text{Ni}_2\text{P}$  or cubic  $\text{Rh}_2\text{P}$  crystal structures.

**Table S9.** Peak fitting analysis of bond angle distributions for Ni<sub>2</sub>P and Ni<sub>1.6</sub>Rh<sub>0.4</sub>P shown in Figure S16, where x<sub>0</sub> indicates the peak position and deviation from ideal structure.

|                                                          | FWHM (Ni-P-Ni) | x <sub>0</sub> |
|----------------------------------------------------------|----------------|----------------|
| <b>Ni<sub>2</sub>P/SiO<sub>2</sub></b>                   |                |                |
| Ambient Temperature                                      | 7.76 ± 0.69    | 74.64 ± 0.29   |
| 350 °C in H <sub>2</sub>                                 | 13.22 ± 1.29   | 79.06 ± 0.53   |
| 350 °C in Guaiacol                                       | 23.08 ± 2.65   | 80.42 ± 1.06   |
| <b>Ni<sub>1.6</sub>Rh<sub>0.4</sub>P/SiO<sub>2</sub></b> |                |                |
| Ambient Temperature                                      | 18.46 ± 1.32   | 80.76 ± 0.53   |
| 350 °C in H <sub>2</sub>                                 | 23.26 ± 1.70   | 83.01 ± 0.68   |
| 350 °C in Guaiacol                                       | 45.08 ± 2.81   | 88.91 ± 0.99   |

**Table S10.** Catalytic performance data from the guaiacol HDO reaction at 350 °C, 0.5 MPa, 12:1 H<sub>2</sub>:guaiacol molar ratio, WHSV = 5 h<sup>-1</sup>, presented as an average between 290 and 460 min time-on-stream for SiO<sub>2</sub>-supported Ni<sub>2</sub>P, Ni<sub>1.6</sub>Rh<sub>0.4</sub>P, and Rh<sub>2</sub>P catalysts.

|                                             | Ni <sub>2</sub> P       | Ni <sub>1.6</sub> Rh <sub>0.4</sub> P | Rh <sub>2</sub> P      |
|---------------------------------------------|-------------------------|---------------------------------------|------------------------|
| <b>Conversion (%)</b>                       | 14.0                    | 17.7                                  | 13.7                   |
| <b>STY (1/s)</b>                            | 13.7 x 10 <sup>-2</sup> | 16.6 x 10 <sup>-2</sup>               | 6.4 x 10 <sup>-2</sup> |
| <b>Total Carbon Product Selectivity (%)</b> |                         |                                       |                        |
| 2-Methoxycyclohexanone                      | 3.92                    | 3.8                                   | 0.92                   |
| 1,2-Dimethoxy Benzene                       | -                       | 1.46                                  | 3.41                   |
| Catechol                                    | -                       | 7.24                                  | 2.94                   |
| Cyclohexanol                                | 1.99                    | 2.96                                  | 0.73                   |
| Cyclohexanone                               | 7.91                    | 7.30                                  | 2.51                   |
| Anisole                                     | 9.33                    | 7.47                                  | 12.3                   |
| Phenol                                      | 41.9                    | 47.6                                  | 64.2                   |
| Methanol                                    | 4.67                    | 4.93                                  | 3.4                    |
| Benzene                                     | 1.39                    | 0.84                                  | 0.67                   |
| Cyclohexane                                 | 11.0                    | 5.77                                  | 2.82                   |
| Cyclohexene                                 | 5.82                    | 2.22                                  | 0.81                   |
| 1-Methoxy 3-Hexene                          | 1.89                    | 0.86                                  | 0.12                   |
| Methoxy Cyclohexane                         | 1.43                    | 1.68                                  | 0.11                   |
| Toluene                                     | 0.22                    | -                                     | 0.14                   |
| Pentane                                     | 0.38                    | 0.18                                  | -                      |
| Methyl Cyclopentane                         | 0.18                    | 0.08                                  | 0.01                   |
| Methane                                     | 7.93                    | 5.64                                  | 4.93                   |



**Table S11.** Catalytic performance data from the *m*-cresol HDO reaction at 350 °C, 0.5 MPa, 8:1 H<sub>2</sub>:*m*-cresol molar ratio, WHSV = 5 h<sup>-1</sup>, presented as an average between 290 and 460 min time-on-stream for the series of SiO<sub>2</sub>-supported Ni<sub>2</sub>P, Ni<sub>2-x</sub>Rh<sub>x</sub>P, and Rh<sub>2</sub>P catalysts.

|                                             | Ni <sub>2</sub> P      | Ni <sub>1.8</sub> Rh <sub>0.2</sub> P | Ni <sub>1.6</sub> Rh <sub>0.4</sub> P | Ni <sub>1.4</sub> Rh <sub>0.6</sub> P | Ni <sub>1.2</sub> Rh <sub>0.8</sub> P | Rh <sub>2</sub> P      |
|---------------------------------------------|------------------------|---------------------------------------|---------------------------------------|---------------------------------------|---------------------------------------|------------------------|
| <b>Conversion (%)</b>                       | 7.71                   | 11.29                                 | 7.78                                  | 9.91                                  | 13.91                                 | 9.32                   |
| <b>STY (s<sup>-1</sup>)</b>                 | 6.8 x 10 <sup>-2</sup> | 8.3 x 10 <sup>-2</sup>                | 6.4 x 10 <sup>-2</sup>                | 9.6 x 10 <sup>-2</sup>                | 9.7 x 10 <sup>-2</sup>                | 3.8 x 10 <sup>-2</sup> |
| <b>Total Carbon Product Selectivity (%)</b> |                        |                                       |                                       |                                       |                                       |                        |
| Cyclohexane                                 | 1.35                   | 0.87                                  | 0.47                                  | 1.00                                  | 0.82                                  | 0.37                   |
| Methylcyclohexane                           | 3.51                   | 2.81                                  | 1.75                                  | 1.68                                  | 1.63                                  | 0.66                   |
| Methylcyclohexene                           | 8.77                   | 7.99                                  | 17.9                                  | 10.6                                  | 6.38                                  | 2.95                   |
| Benzene                                     | 0.63                   | 0.83                                  | 0.32                                  | 0.62                                  | 0.65                                  | 0.26                   |
| Toluene                                     | 35.2                   | 33.7                                  | 29.1                                  | 21.2                                  | 29.7                                  | 78.0                   |
| Xylene (isomers)                            | 0.89                   | 0.85                                  | 0.56                                  | 1.30                                  | 1.55                                  | 0.41                   |
| Cyclohexanol                                | 0.01                   | 0.01                                  | 0.00                                  | 0.01                                  | 0.00                                  | 0.00                   |
| Methylcyclohexanol                          | 0.86                   | 4.27                                  | 2.31                                  | 6.58                                  | 7.56                                  | 0.10                   |
| Cyclohexanone                               | 0.02                   | 0.02                                  | 0.01                                  | 0.03                                  | 0.01                                  | 0.01                   |
| Methylcyclohexanone                         | 30.4                   | 33.9                                  | 37.8                                  | 40.4                                  | 37.4                                  | 5.14                   |
| Light hydrocarbons (C1-C5)                  | 10.5                   | 13.6                                  | 4.99                                  | 13.7                                  | 12.2                                  | 10.8                   |

**Table S12.** Hydrogenation (HYD) and direct deoxygenation (DDO) pathway selectivities calculated using the product selectivities tabulated in Table S10. Pathway selectivity to HYD included methylcyclohexanone, methylcyclohexanol, methylcyclohexene, and methylcyclohexane. Pathway selectivity to DDO included toluene, benzene, and xylene.

|            | Ni <sub>2</sub> P | Ni <sub>1.8</sub> Rh <sub>0.2</sub> P | Ni <sub>1.6</sub> Rh <sub>0.4</sub> P/SiO <sub>2</sub> | Ni <sub>1.4</sub> Rh <sub>0.6</sub> P/SiO <sub>2</sub> | Ni <sub>1.2</sub> Rh <sub>0.8</sub> P/SiO <sub>2</sub> | Rh <sub>2</sub> P/SiO <sub>2</sub> |
|------------|-------------------|---------------------------------------|--------------------------------------------------------|--------------------------------------------------------|--------------------------------------------------------|------------------------------------|
| <b>HYD</b> | 54.3              | 58.0                                  | 66.6                                                   | 71.9                                                   | 62.4                                                   | 10.1                               |
| <b>DDO</b> | 45.7              | 42.0                                  | 33.4                                                   | 28.1                                                   | 37.6                                                   | 89.9                               |

**Table S13.** DFT-calculated lattice parameters (*a* and *c*, in Å) for bulk Ni<sub>2-x</sub>Rh<sub>x</sub>P (*x* = 0, 0.17, 0.33, 0.50, 0.67, 0.83, 2). Experimental lattice parameters are provided for the parent Ni<sub>2</sub>P and Rh<sub>2</sub>P bulk materials.

| <i>x</i> | <i>a</i> ( <i>c</i> ), Å |                           |
|----------|--------------------------|---------------------------|
|          | DFT                      | Experimental              |
| 0        | 5.80 (3.35)              | 5.86 (3.38) <sup>23</sup> |
| 0.17     | 5.83 (3.37)              |                           |
| 0.33     | 5.86 (3.38)              |                           |
| 0.50     | 5.88 (3.40)              |                           |
| 0.67     | 5.90 (3.41)              |                           |
| 0.83     | 5.93 (3.42)              |                           |
| 2        | 5.50                     | 5.50 <sup>24</sup>        |

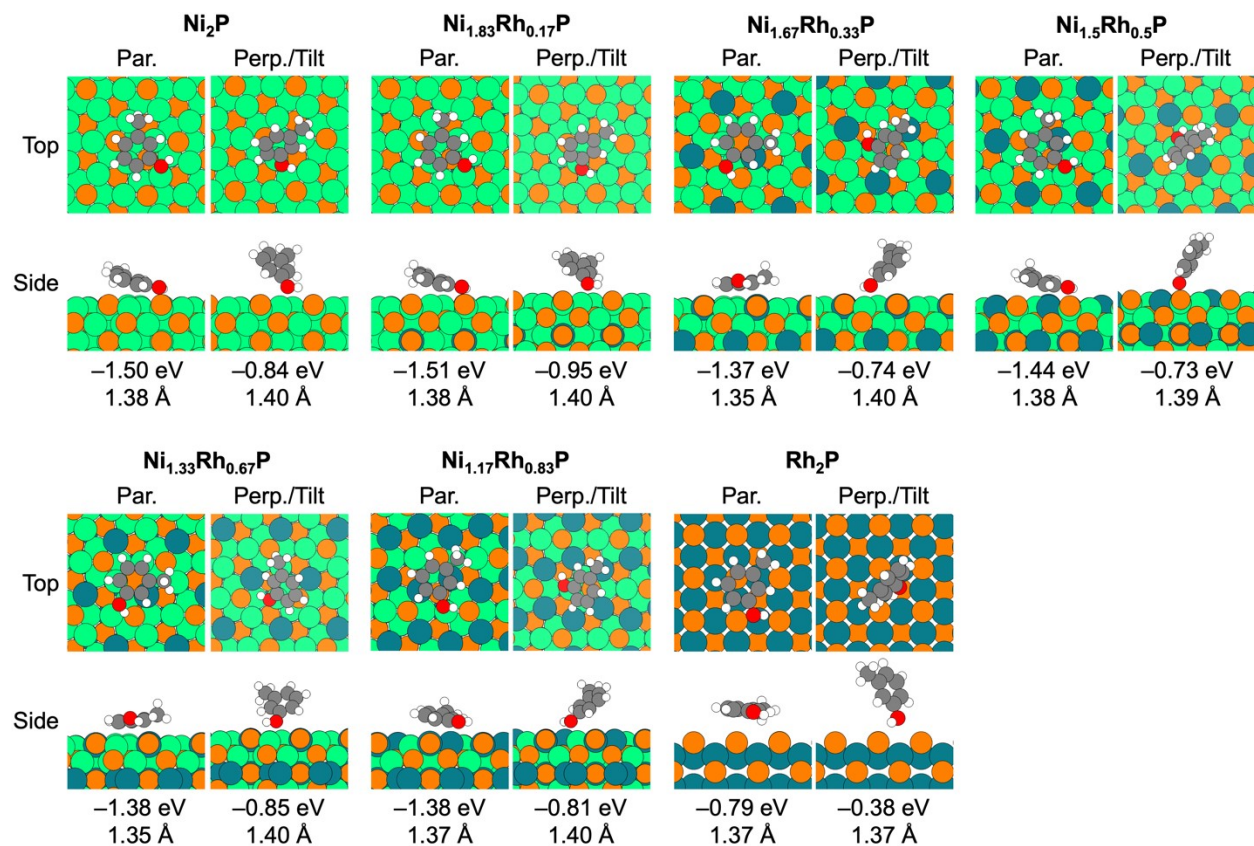

**Figure S18.** Top and side views of *m*-cresol\* adsorption on Ni<sub>3</sub>P-terminated Ni<sub>2-x</sub>Rh<sub>x</sub>P(0001) ( $x = 0, 0.17, 0.33, 0.5, 0.67, 0.83$ ) and P-terminated Rh<sub>2</sub>P(100) ( $x = 2.0$ ) in both parallel (Par.) and perpendicular/tilted (Perp./Tilt) adsorption configurations. Adsorption energies and Ph-OH bond distances are provided below each configuration. Atom colors: orange – P, green – Ni, teal – Rh, grey – C, white – H, red – O

**Table S14.** Adsorption energies ( $E_B$ , in eV) for OH\* on Ni<sub>3</sub>P-terminated Ni<sub>2</sub>P(0001) with the lattice constant of the corresponding Ni<sub>2-x</sub>Rh<sub>x</sub>P(0001) surface ( $x = 0.17, 0.33, 0.50, 0.67, 0.83$ ).

| $x$  | $E_B(\text{OH})$ (eV) |
|------|-----------------------|
| 0.17 | -3.43                 |
| 0.33 | -3.42                 |
| 0.50 | -3.40                 |
| 0.67 | -3.39                 |
| 0.83 | -3.38                 |

## References

1. Cai, Z.; Chattopadhyay, N.; Liu, W.J.; Chan, C.; Pignol, J-P.; Reilly, R.M. Optimized digital counting colonies of clonogenic assays using ImageJ software and customized macros: Comparison with manual counting. *Int. J. Radiat. Biol.* **2011**, *87*, 1135–1146.

2. Lutterotti, L.; Bortolotti, M. Object-oriented programming and fast computation techniques in Maud, a program for powder diffraction analysis written in Java. *Int. Union Crystallogr.* **2003**.
3. Chupas, P.J.; Chapman, K.W.; Jennings, G.; Lee, P.L.; Grey, C.P. Watching nanoparticles grow: The mechanism and kinetics for the formation of TiO<sub>2</sub>-supported platinum nanoparticles. *J. Am. Chem. Soc.* **2007**, *129*, 13822–13824.
4. Juhás, P.; Davis, T.; Farrow, C.L.; Billinge, S.J.L. PDFgetX3: A rapid and highly automatable program for processing powder diffraction data into total scattering pair distribution functions. *J. Appl. Crystallogr.* **2013**, *46*, 560–566.
5. Aoun, B. Fullrnc, A rigid body reverse monte carlo modeling package enabled with machine learning and artificial intelligence. *J. Comput. Chem.* **2016**, *37*, 1102–1111.
6. Neugebauer, J.; Scheffler, M. Adsorbate-substrate and adsorbate-adsorbate interactions of Na and K adlayers on Al(111). *Phys. Rev. B.* **1992**, *46*, 16067–16080.
7. Bengtsson, L. Dipole correction for surface supercell calculations. *Phys. Rev. B.* **1999**, *59*, 12301–12304.
8. Tang, W.; Sanville, E.; Henkelman, G. A grid-based Bader analysis algorithm without lattice bias. *J. Phys. Condens. Matter.* **2009**, *21*, 084204.
9. Sanville, E.; Kenny, S.D.; Smith, R.; Henkelman, G. Improved grid-based algorithm for Bader charge allocation. *J. Computational Chem C.* **2007**.
10. Henkelman, G.; Arnaldsson, A.; Jónsson, H. A fast and robust algorithm for Bader decomposition of charge density. *Comput. Mater. Sci.* **2006**, *36*, 354–360.
11. Yu, M.; Trinkle, D.R. Accurate and efficient algorithm for Bader charge integration. *J. Chem. Phys.* **2011**, *134*, 064111.
12. Nørskov, J. K.; Abild-Pedersen, F.; Studt, F.; Bligaard, T. Density functional theory in surface chemistry and catalysis. *Proc. Natl. Acad. Sci.* **2011**, *108*, 937–943.
13. Michalsky, R.; Zhang, Y.-J.; Medford, A.J.; Peterson, A.A. Departures from the adsorption energy scaling relations for metal carbide catalysts. *J. Phys. Chem. C.* **2014**, *118*, 13026–13034.
14. Wang, X.; Wan, F.; Gao, Y.; Liu, J.; Jiang, K. Synthesis of high-quality Ni<sub>2</sub>P hollow sphere via a template-free surfactant-assisted solvothermal route. *J. Cryst. Growth.* **2008**, *310*, 2569–2574.

15. Secoue, M.; Auvray, P.; Toudic, Y.; Ballini, Y.; Guerin, R. Synthesis, lattice parameters and thermal expansion coefficients of rhodium arsenide  $\text{Rh}_2\text{As}$  and some substituted compounds. *J. Cryst. Growth*. **1986**, *76*, 135–141.
